# Supplementary material
Source: HighWire-hosted journal article supplement (https://tech.snmjournals.org/highwire/filestream/8616/field_highwire_adjunct_files/0/jnmt061275_Supplemental_Figures.pdf)
Supplement: jnmt061275_Supplemental_Figures.pdf [file jnmt061275_Supplemental_Figures.pdf]

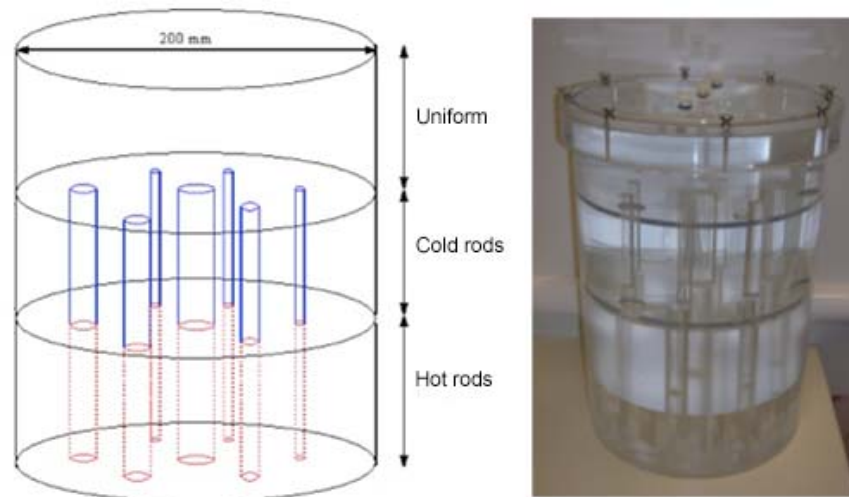

**SUPPLEMENTAL FIGURE 1.** Sketch (rod diameter not to scale) and photograph of the real uniform, hot rod, and cold rod phantom that was numerically mimicked in this study.

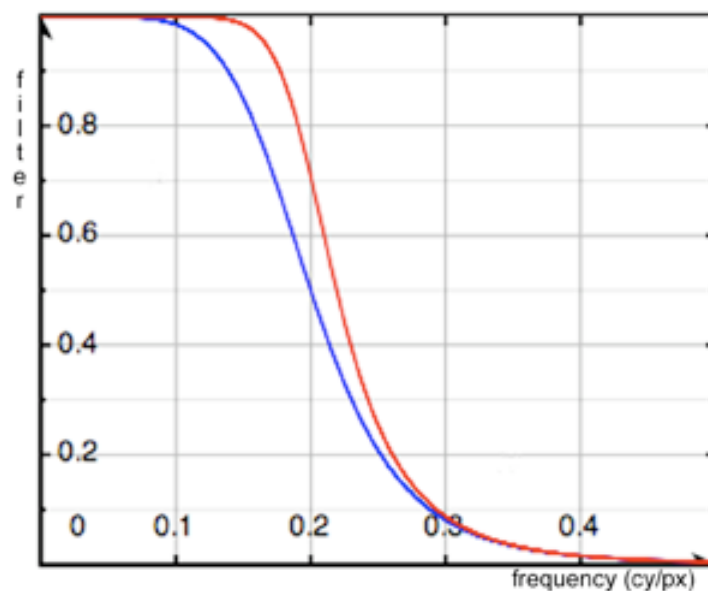

**SUPPLEMENTAL FIGURE 2.** Curve in the Fourier space of the order 6 Butterworth filter at a cutoff frequency of 0.2 cycle per pixel (cy/px) when using the formula with the square root (red) or without the square root (blue). The filter value at the cutoff frequency is half the square root of 2 when using the formula with the square root and 0.5 when using the formula without the square root. For a given cutoff frequency, a less smoothing filter is obtained when using the formula with the square root.
